# Supplementary material for: Tannic acid capped gold nanoparticles: capping agent chemistry controls the redox activity
Source: Royal Society of Chemistry journal article supplement (doi:10.1039/c9cp00056a), 2019-01-01
Supplement: c9cp00056a1.pdf [file c9cp00056a1.pdf]

## SUPPORTING INFORMATION

### Tannic Acid Capped Gold Nanoparticles: Capping Agent Chemistry Controls the Redox Activity

Alex L. Suherman<sup>1</sup>, Giorgia Zampardi<sup>1</sup>, Hatem M. A. Amin<sup>1</sup>, Neil P. Young<sup>2</sup>, Richard G. Compton<sup>1,\*</sup>

<sup>1</sup>Department of Chemistry, Physical and Theoretical Chemistry Laboratory, Oxford University,  
South Parks Road, Oxford OX1 3QZ, UK.

<sup>2</sup>Department of Materials, Oxford University, Parks Road, OX1 3PH, UK.

#### 1. Calculation Details

Concentration of AuNPs@TA suspension =  $2.2 \times 10^{10}$  particles ml<sup>-1</sup>

Surface area of glassy carbon electrode ( $\pi r_e^2$ ),  $r_e 1.48 \pm 0.02$  mm, = ca.  $6.9 \times 10^{-6}$  m<sup>2</sup>

Radius of core AuNP,  $r_p$ , is 31.1 nm

##### 1.1. Ensembles Particle Level

(a) **Number of AuNPs@TA particles** onto GCE surface for one-monolayer surface coverage,  $N$ , considering closest packing of equal sphere of 91%, calculated as follow:

$$N = 0.91 * \frac{\text{Surface area of GCE}}{\text{Surface area of AuNPs@TA}} = 0.91 \frac{\pi r_e^2}{\pi r_p^2} = \text{ca. } 2.0 \times 10^9 \text{ particles}$$

(b) **Total surface area of AuNPs@TA** drop-cast onto GCE surface,  $A$ , calculated as follow:

$$A = N * (4\pi r_p^2) = 2.0 \times 10^9 \text{ particles} * (1.2 \times 10^{-14} \text{ m}^2) = 2.4 \times 10^{-5} \text{ m}^2$$

##### 1.2. Individual Particles Level (Nanoimpacts)

From the oxidative nanoimpacts experiment with the absence of the metal cations (oxidation of TA capping agent), the average spikes charge,  $Q$ , was found to be ca. 0.3 pC.

The number of moles,  $n$ , of TA involved in the reaction is calculated using Faraday's first law:

$$n = \frac{Q}{zF}$$

where,  $z$  is the number of electron transfer during oxidation of TA (assuming fully oxidised,  $z = 20$ ) and  $F$  is the Faraday's constant ( $96485.33 \text{ C mol}^{-1}$ ). The number of moles TA was found to be ca.  $1.6 \times 10^{-19}$  or equal to **ca.  $1.0 \times 10^5$  molecules**.

Meanwhile, the apparent number of TA molecules incorporated in a single AuNP core was calculated by dividing volume of AuNP core with known volume of a single TA molecule ( $8.6 \times 10^{-28} \text{ m}^3$ )<sup>23</sup>

$$N_{\text{TA}} = \frac{1.07 \times 10^{-22} \text{ m}^3}{8.6 \times 10^{-28} \text{ m}^3} = \text{ca. } 1.2 \times 10^5 \text{ molecules.}$$

### 1.3. Underpotential Deposition (UPD) of Zinc onto Ensembles of AuNPs@TA

- From CV experiments, reductive charge of the Zn (UPD),  $Q$ , is ca.  $17.2 \mu\text{C}$ .
- Surface coverage of  $0.2 \text{ mM Zn}^{2+}$  UPD ( $z = 2$ ,  $F$  is Faraday constant  $96485.33 \text{ C mol}^{-1}$  and  $A = 2.4 \times 10^{-5} \text{ m}^2$  is total surface area of one-monolayer of AuNPs@TA drop casted onto GCE surface) calculated as follow:

$$\begin{aligned} & \frac{Q}{zFA} \\ & \frac{17.2 \times 10^{-6} \text{ C}}{(2) \cdot (96485.33 \text{ C mol}^{-1}) \cdot (0.24 \text{ cm}^2)} \\ & = \text{ca. } 3.7 \times 10^{-10} \text{ mol cm}^{-2} \\ & = \text{ca. } 2.2 \times 10^{14} \text{ atoms cm}^{-2} \end{aligned}$$

## 2. Supporting Figures

### 2.1. Characterisation of AuNPs@TA

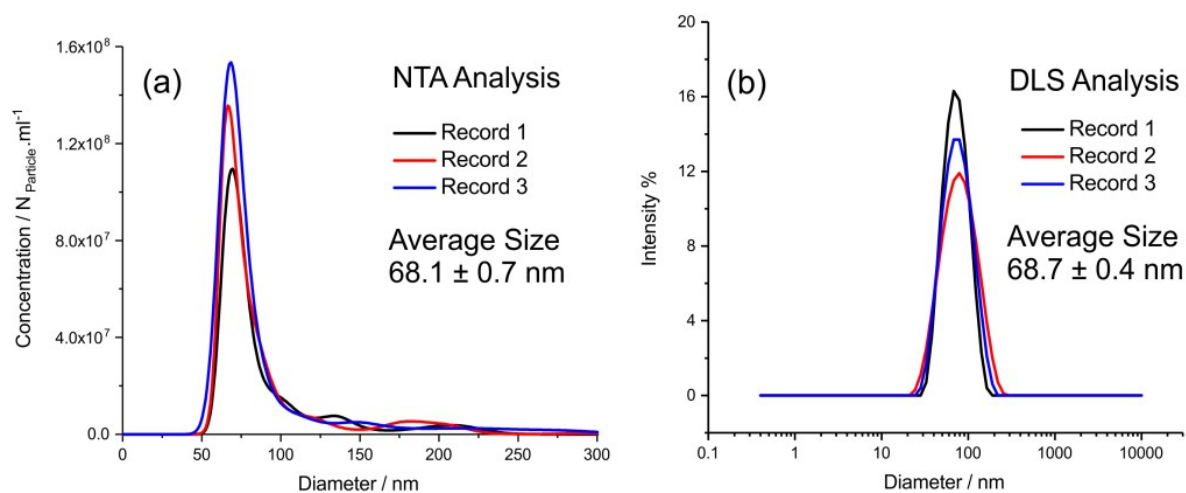

Figure SI.1. Characterization of the AuNPs@TA using (a) NTA and (b) DLS analysis

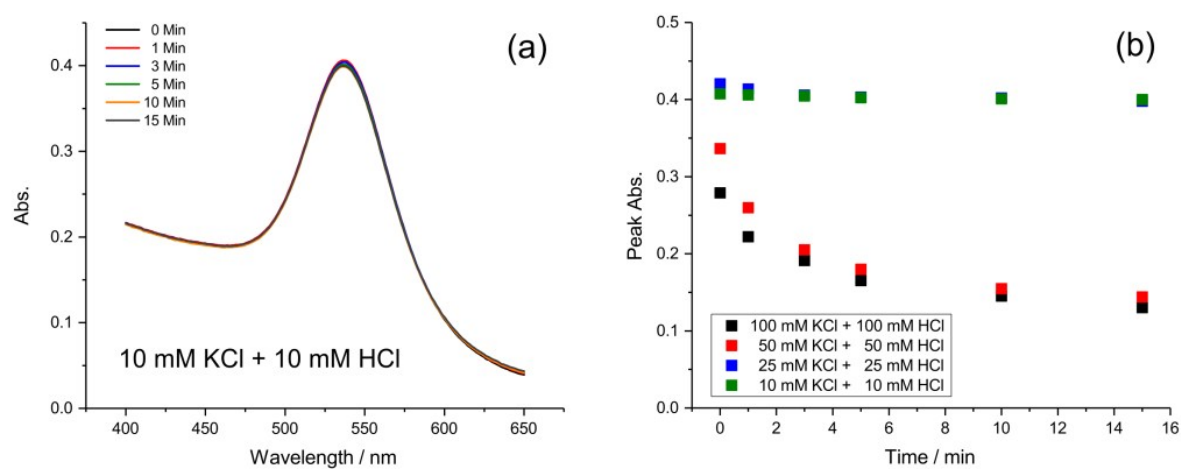

Figure SI.2. UV-vis analysis of AuNPs@TA. (a) UV-vis spectra of ca. 10 pM AuNPs@TA in a solution of 10 mM KCl + 10 mM HCl, (b) Plot of peak absorbance of AuNPs@TA in various electrolyte concentrations during 15 mins.

## 2.2. Electrochemical Analysis of AuNPs@TA

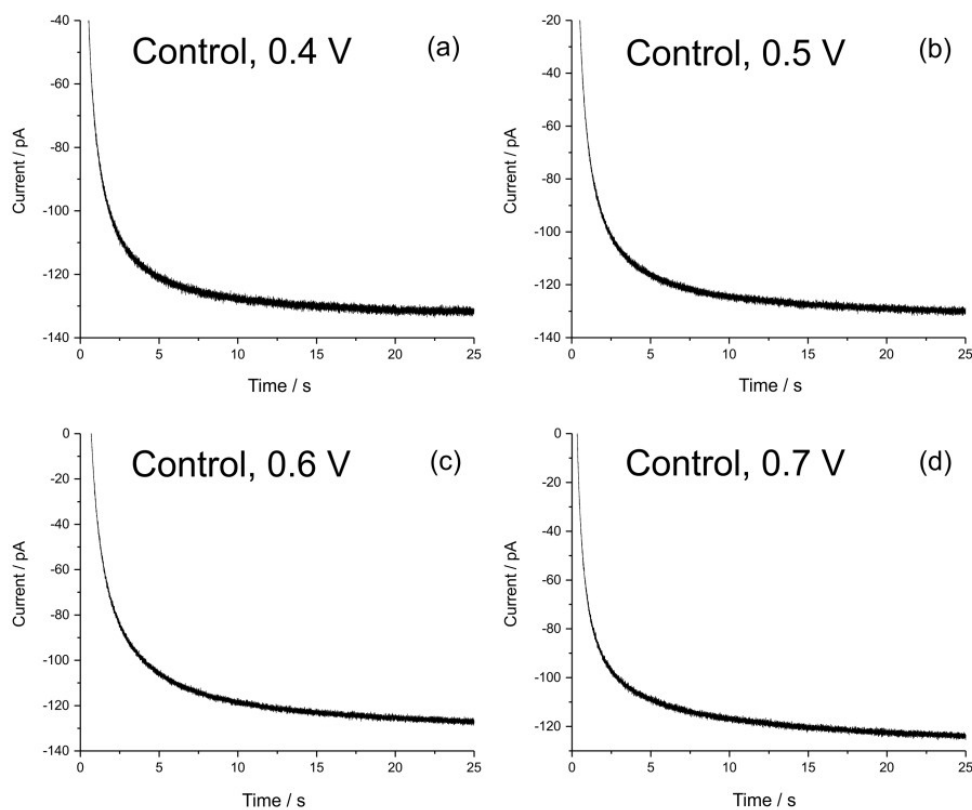

**Figure SI.3.** Oxidative particle impacts analysis. Representative chronoamperograms of microdisc electrode immersed in solution containing of 10 mM KCl + 10 mM HCl at potential of 0.4, 0.5, 0.6, 0.7 V vs SCE.

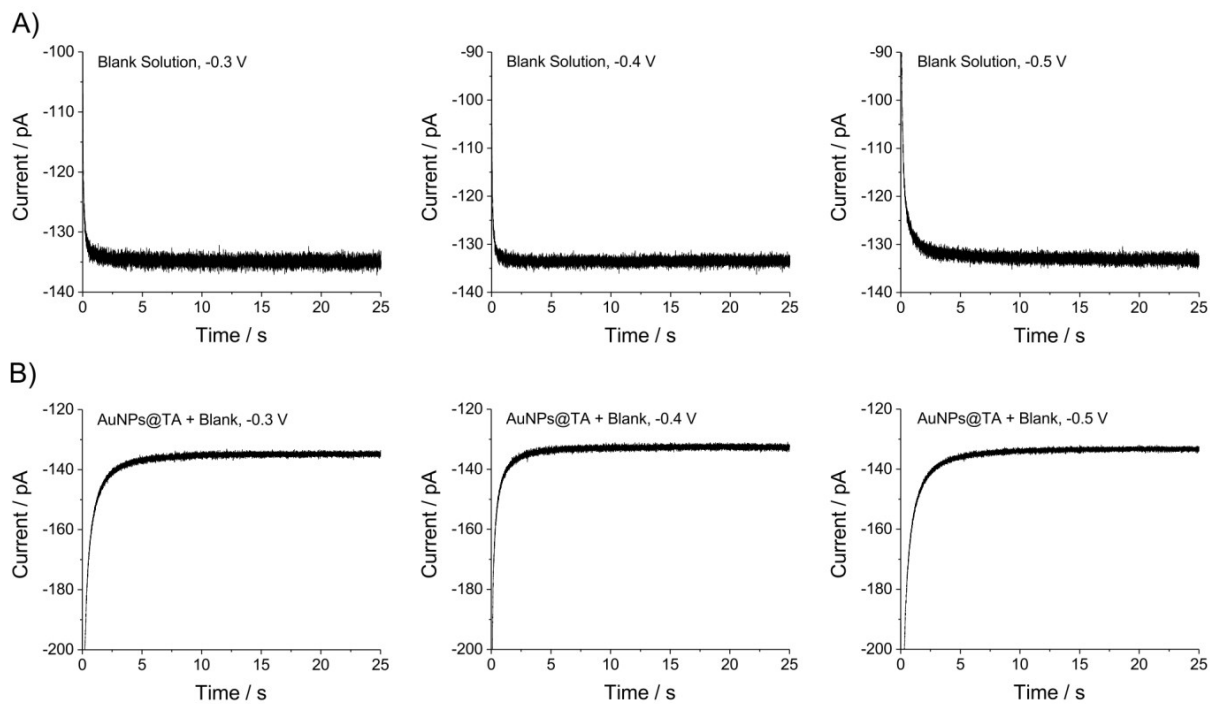

**Figure SI.4.** Reductive particle impacts analysis. Representative chronoamperograms of microdisc electrode immersed in solution containing of (a) blank and (b) AuNPs@TA + blank at potential of -0.3, -0.4, -0.5 V vs SCE.

### 2.3. Electrochemical Analysis of Ensembles of AuNPs@TA with Metal Cations

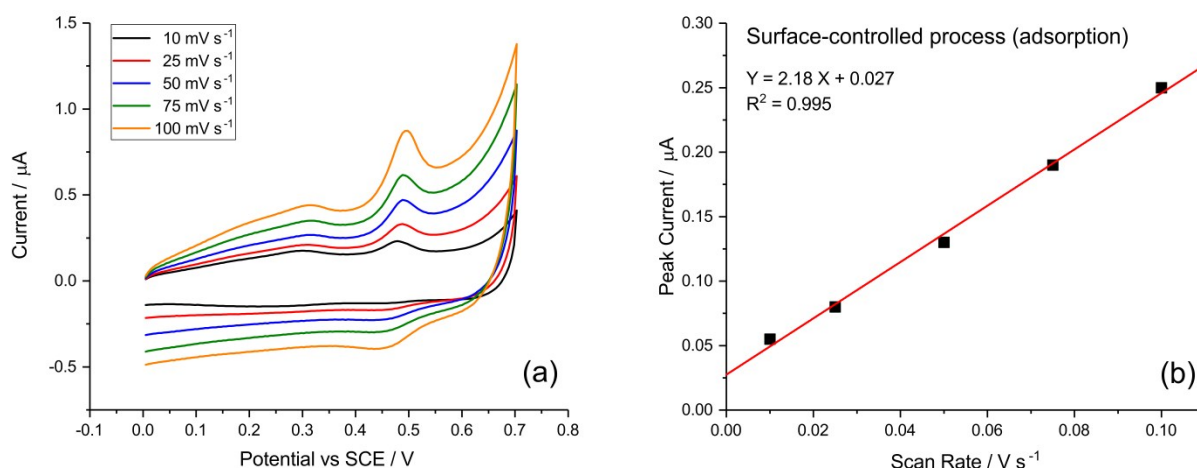

**Figure SI.5** (a) Cyclic voltammograms of one-monolayer surface coverage of AuNPs@TA-GCE at various scan rates, (b) Linearity of peak current of the “peak 2” at various scan rates shown in (a).

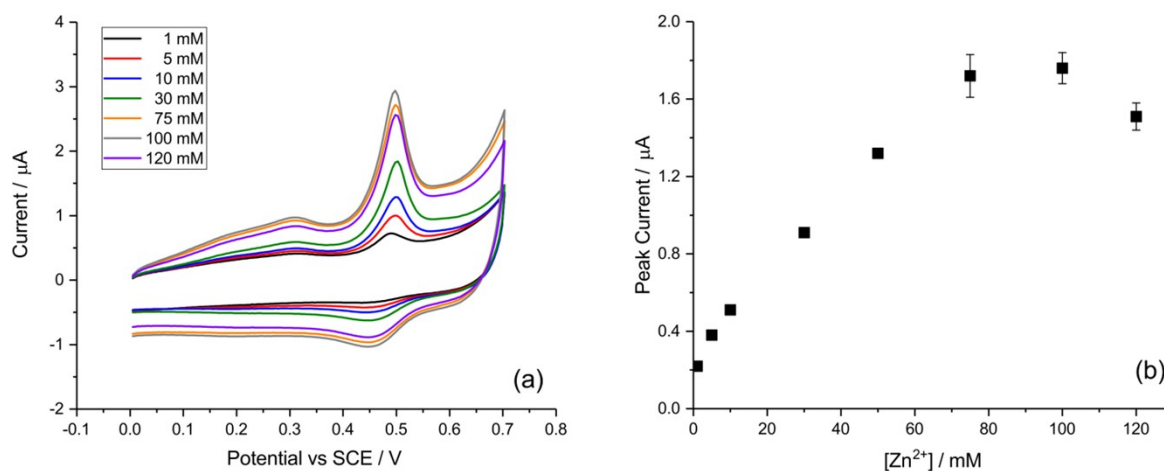

**Figure SI.6.** (a) Cyclic voltammograms of one-monolayer surface coverage of AuNPs@TA-GCE at various concentrations of Zn<sup>2+</sup>. (b) Plot of peak current of the “peak 2” at various concentrations of Zn<sup>2+</sup>

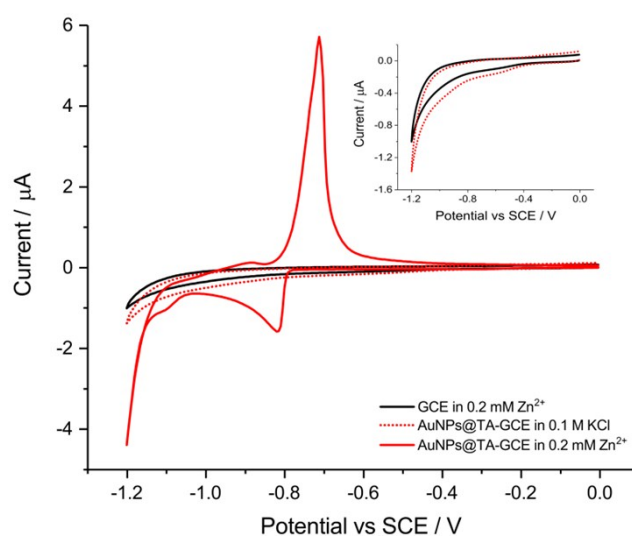

**Figure SI.7.** Underpotential deposition of Zn<sup>2+</sup> at the ensembles of AuNPs@TA, at a scan rate of 0.02 V s<sup>-1</sup>

## 2.4. Particle Impacts Analysis of Individual AuNPs@TA with Metal Cations

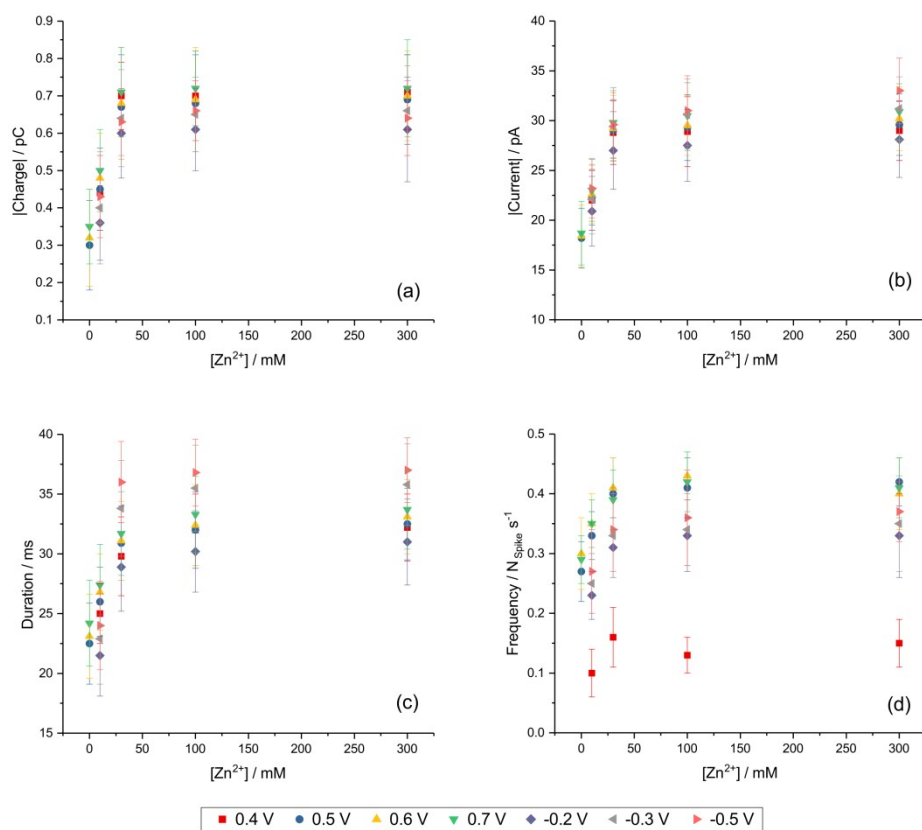

**Figure SI.8.** Linear relationship between average spikes: (a) charge, (b) current, (c) duration and (d) frequency with different potentials at various  $Zn^{2+}$  concentrations, resulting from oxidative and reductive particle impacts

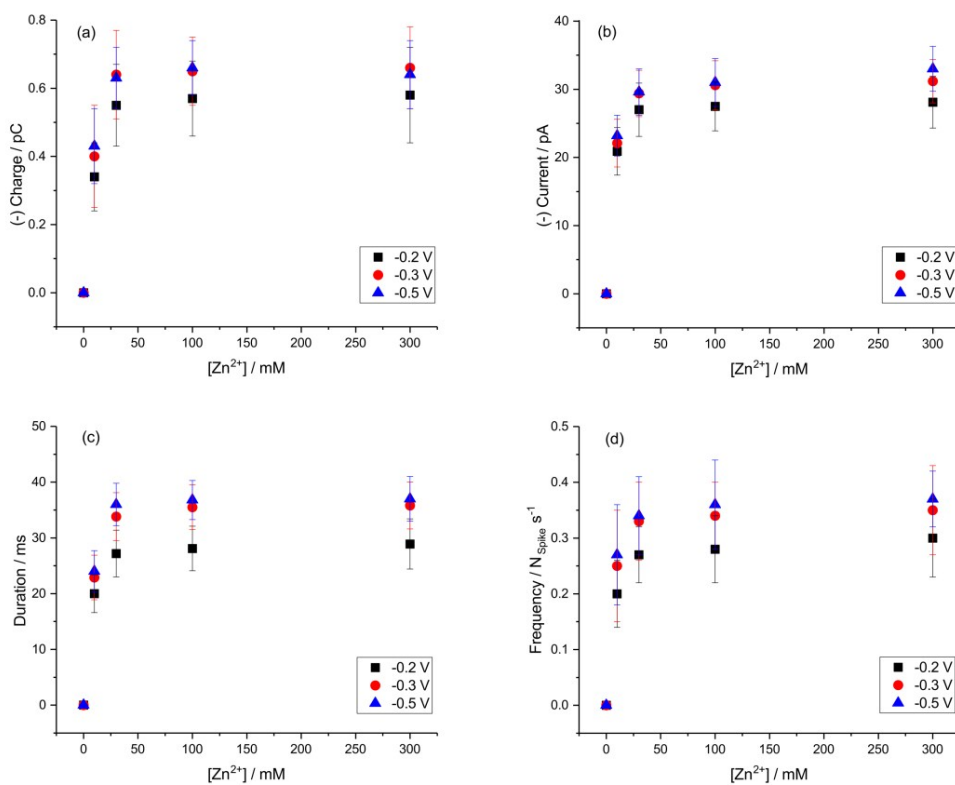

**Figure SI.9.** Reductive particle impacts. Linear relationship between average spikes: (a) charge, (b) current, (c) duration and (d) frequency with potentials at various  $Zn^{2+}$  concentrations (potential of -0.2, -0.3 and -0.5 V).

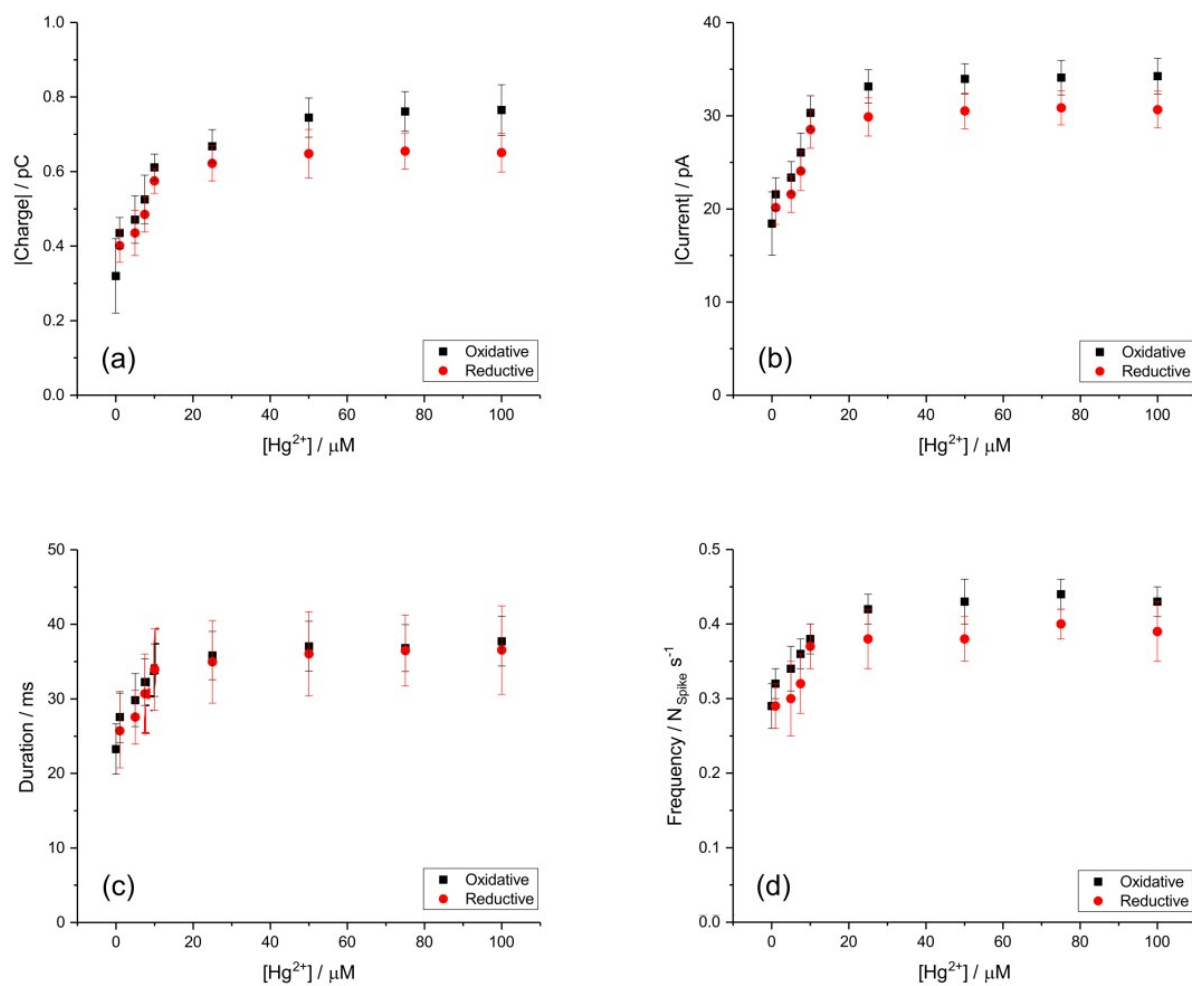

**Figure SI.10.** Linear relationship between average spikes: (a) charge, (b) current, (c) duration, (d) frequency at various  $\text{Hg}^{2+}$  concentrations, resulting from oxidative and reductive particle impacts (potential of -0.2 to -0.6 V)

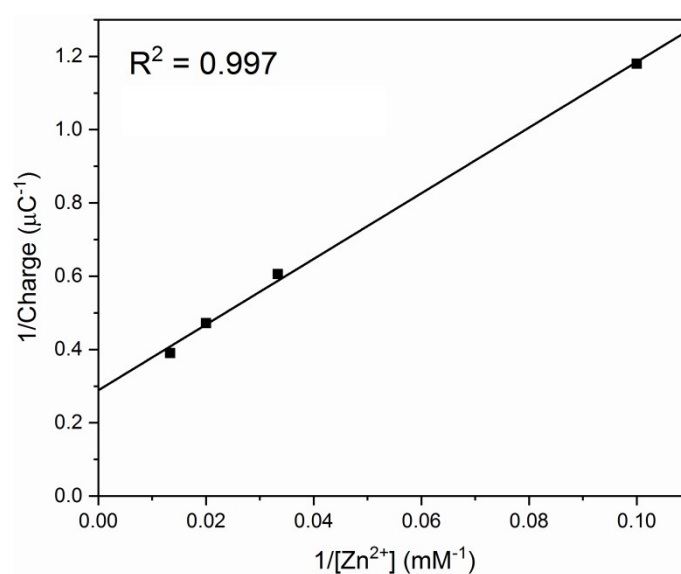

**Figure SI.11.** Langmuir plot of  $\text{Zn}^{2+}$  on ensembles AuNPs@TA (before saturation) with  $K = \text{ca. } 0.11 \text{ mM}^{-1}$
